# Supplementary material for: Hybrids based on borate-functionalized cellulose nanofibers and noble-metal nanoparticles as sustainable catalysts for environmental applications
Source: PubMed Central journal article supplement — RSC Adv. 2020 Mar 26;10(21):12460–8. doi: 10.1039/d0ra01528h (PMC9051117; doi:10.1039/d0ra01528h), 2020-03-26
Supplement: RA-010-D0RA01528H-s001.pdf [file RA-010-D0RA01528H-s001.pdf]

# Hybrids Based on Borate-Functionalized Cellulose Nanofibers and Noble-Metal Nanoparticles as Sustainable Catalyst for Environmental Applications

*Vicente Esquivel-Peña,<sup>‡</sup> Valentina Guccini,<sup>‡h</sup> Sugam Kumar,<sup>†</sup> German Salazar-Alvarez,<sup>‡h</sup> Eduardo Rodríguez de San Miguel<sup>‡</sup> and Josefina de Gyves<sup>\*‡</sup>*

<sup>‡</sup> Departamento de Química Analítica, Facultad de Química, UNAM, Ciudad Universitaria, 04510. Ciudad de México, México

<sup>†</sup> Department of Materials and Environmental Chemistry, Arrhenius Laboratory, Stockholm University, SE-106 91 Stockholm, Sweden

<sup>h</sup> Wallenberg Wood Science Center, KTH Royal Institute of Technology, SE-100 44 Stockholm, Sweden

\* Corresponding Author: Josefina de Gyves, [degyves@unam.mx](mailto:degyves@unam.mx)

## **Microwave-assisted acid digestion of MNPs/CNF samples**

The content of metal supported in CNFs was measured by ICP-OES after a microwave-assisted acid digestion of the samples. Between 2–5 g of the MNPs/CNF suspensions was mixed with 10 mL of a 1:1 HNO<sub>3</sub> solution for the digestion of Ag NPs or 10 mL of aqua regia for the digestion of Au and Pt NPs in PTFE vessels. The samples were digested with a CEM Mars 6 equipment at 180 °C for 20 min after which 2 mL of H<sub>2</sub>O<sub>2</sub> were added and a second cycle of digestion at 210 °C for 15 min was performed to assure the complete digestion of the samples. Finally, the samples were diluted to a volume of 25 mL with 1% (v/v) HNO<sub>3</sub>. A set of aqueous standard solutions was prepared for calibrating the ICP spectrometer by serial dilution of the stock standard solutions. The analyzed metals were measured in the radial visual mode.

## SAXS data analysis

In SAXS experiments, one measures intensity of the scattered X-rays as a function of the magnitude of the scattering vector, which for monodispersed scatterers can be expressed as equation S1:

$$I(Q) = \phi V (\Delta\rho)^2 P(Q) S(Q) \quad (S1)$$

where  $\phi$  is the volume fraction of the scatterers in the scattering volume,  $V$  is the volume of the individual scatterer and  $(\Delta\rho)^2$  is the scattering contrast (the square of the difference in the scattering length densities of the particle and the solvent).  $P(Q)$  denotes the intra-particle structure factor (square of the form factor) which is a function of the shape and size of the particles.  $S(Q)$  represents the interparticle structure factor which describes the interparticle interaction between the particles. In the absence of strong inter-particle correlations (e.g., in the case of a dilute system),  $S(Q)$  may be approximated to unity

For a spherical particle having radius  $R$ ,  $P(Q)$  can be given in equation S2.

$$P(Q) = \left[ 3 \frac{\sin(QR) - (QR)\cos(QR)}{(QR)^3} \right]^2 \quad (S2)$$

For a polydispersed system,  $P(Q)$  can be convoluted with a size distribution function as follows (equation S3):

$$P(Q) = \int P(Q, R) f(R) dR \quad (S3)$$

where  $f(R)$  is the size distribution, which can be given by a log-normal distribution as expressed by equation S4:

$$f(R) = \frac{1}{R\sigma\sqrt{2\pi}} \exp \left[ -\frac{\left( \ln \frac{R}{R_{med}} \right)^2}{2\sigma^2} \right] \quad (S4)$$

where  $R_{med}$  and  $\sigma$  are the median value and the standard deviation, respectively. The mean ( $R_m$ ) and median values ( $R_{med}$ ) are related by  $R_m = R_{med} \exp(\sigma^2/2)$ .

As a first attempt, the data were analyzed by considering the system as a dilute suspension of polydispersed nanoparticles in the solvent. In this model, equations (S2-S4) were used in equation (S1) and  $S(Q)$  was taken  $\sim 1$ . The resulting fitted curves (black lines) are shown in Figure 2a. The fitted curves almost reproduced the scattering profiles in the intermediate- and high- $Q$  region ( $Q > \text{nm}^{-1}$ , indicated by the dotted line in Figure 2a) but were not able to account for the low- $Q$  scattering intensity, which may be a result of the presence of some small nanoparticle aggregates, as also observed in the TEM images. The data, therefore, can be analyzed by summing a power-law behavior (arising from the aggregates) and scattering from polydispersed nanoparticles. The scattering intensity can be written in equation S5.

$$I(Q) = \frac{I_c}{Q^\alpha} + \phi V (\Delta\rho)^2 P(Q) S(Q) \quad (S5)$$

where the first term ( $I_c$  is a  $Q$  independent constant) represents scattering from particle aggregates while the second represents scattering from individual particles [ $P(Q)$  is the same as in equations S2-S4 and  $S(Q) \sim 1$ ].

The data have been analyzed by comparing the calculated scattering from different models to the experimental data and the fitting parameters were optimized by a nonlinear least-squares fitting program.

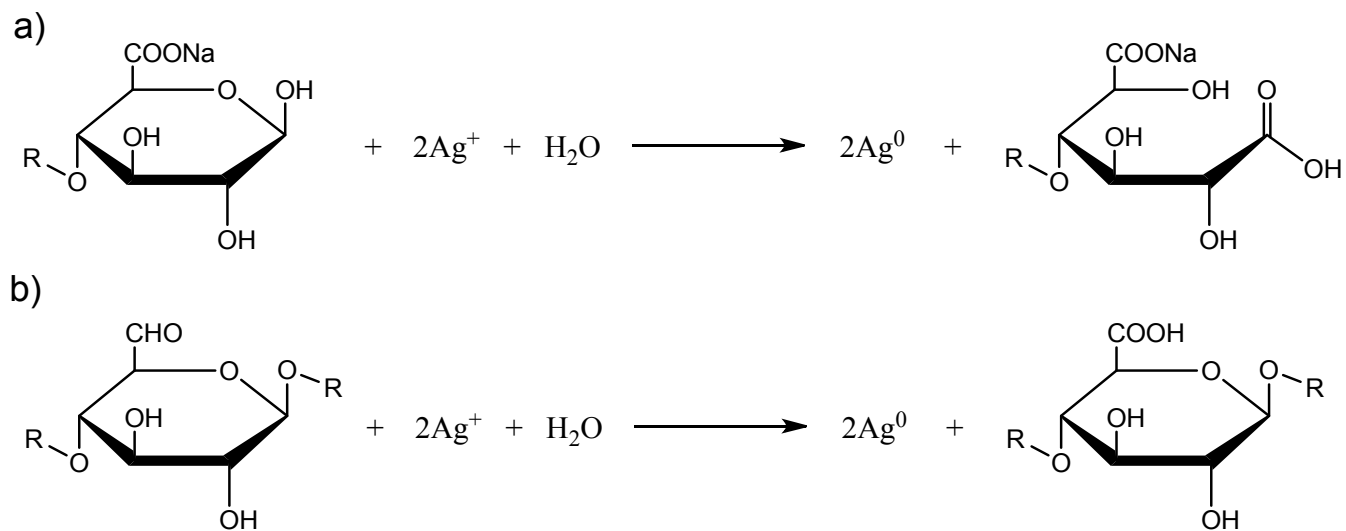

**Scheme S1.** Proposed silver reduction mechanism (AgNPs formation) by a) cellulose hemiacetal groups and b) cellulose C6 aldehydes.

**Table S1.** Metal content for mono- and bi-metallic NPs/CNF obtained by ICP-OES after acid digestion. Results are expressed in mol of metal/g of material obtained.

| Sample        | $C_{\text{Ag}} \times 10^5$<br>(mol g <sup>-1</sup> ) | $C_{\text{Au}} \times 10^5$<br>(mol g <sup>-1</sup> ) | $C_{\text{Pt}} \times 10^5$<br>(mol g <sup>-1</sup> ) |
|---------------|-------------------------------------------------------|-------------------------------------------------------|-------------------------------------------------------|
| Ag NPs/CNF    | 9.89 ± 0.35                                           | ----                                                  | ----                                                  |
| Au NPs/CNF    | ----                                                  | 5.16 ± 0.28                                           | ----                                                  |
| Pt NPs/CNF    | ----                                                  | ----                                                  | 5.21 ± 0.08                                           |
| Ag@Au NPs/CNF | 8.12 ± 0.35                                           | 2.10 ± 0.31                                           | ----                                                  |
| Ag@Pt NPs/CNF | 9.03 ± 0.16                                           | ----                                                  | 1.72 ± 0.05                                           |

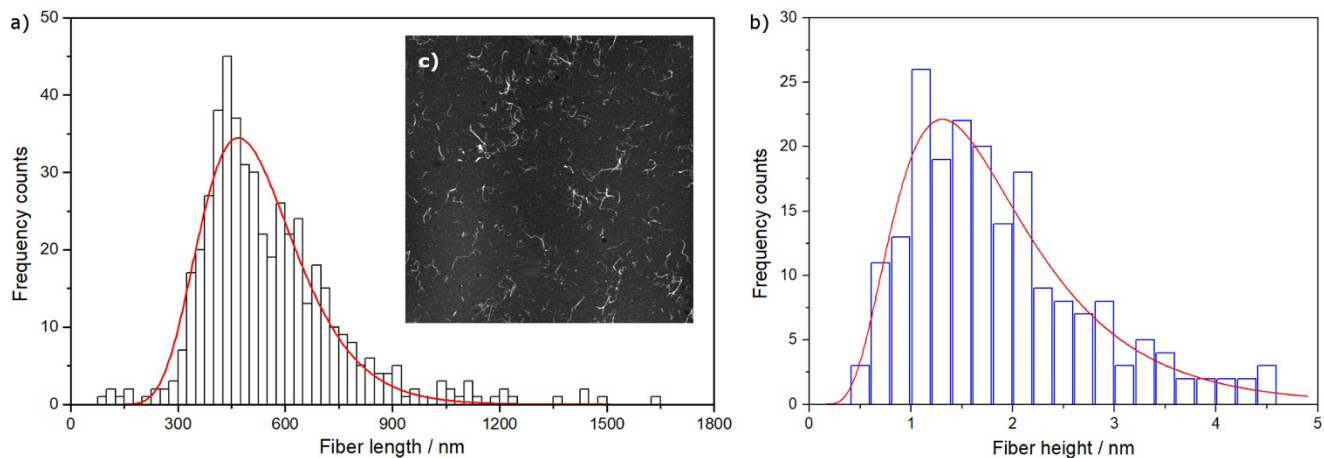

**Figure S1.** Physical characterization of cellulose nanofibers: (a) length distributions, (b) height distribution and (c) AFM image for CNFs.

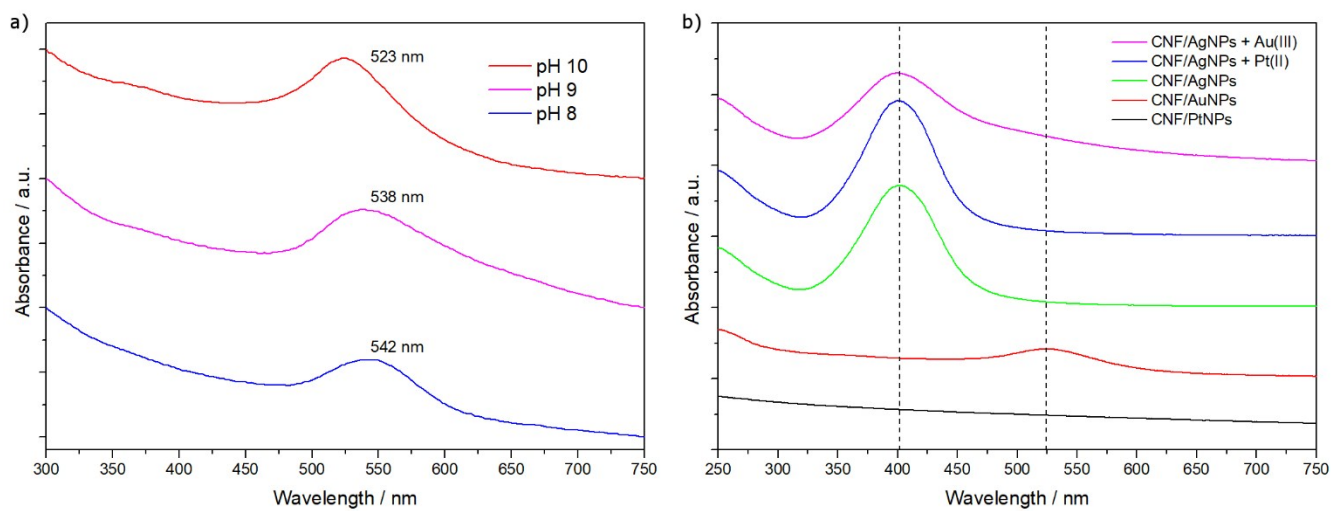

**Figure S2.** Surface plasmon resonance for: (a) AuNPs/CNF as a function of pH, and (b) mono and bimetallic NPs.

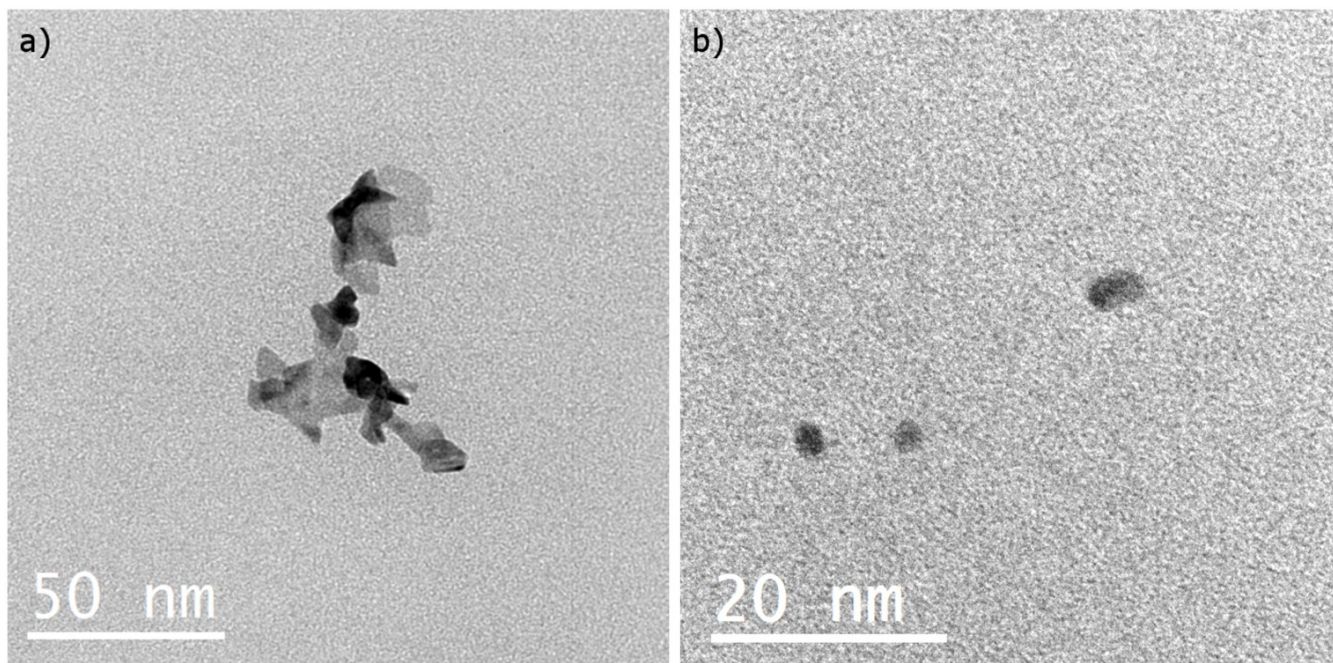

**Figure S3.** TEM images for Pt NPs reduced by (a) cellulose nanofibers and (b) sodium borohydride.

**Table S2.** Mean size of metal nanoparticles obtained by SAXS

| Sample       | Mean size (nm) |
|--------------|----------------|
| Ag NPs/CNF   | $5.3 \pm 1.5$  |
| AgAu NPs/CNF | $5.4 \pm 1.5$  |
| AgPt NPs/CNF | $5.4 \pm 1.5$  |

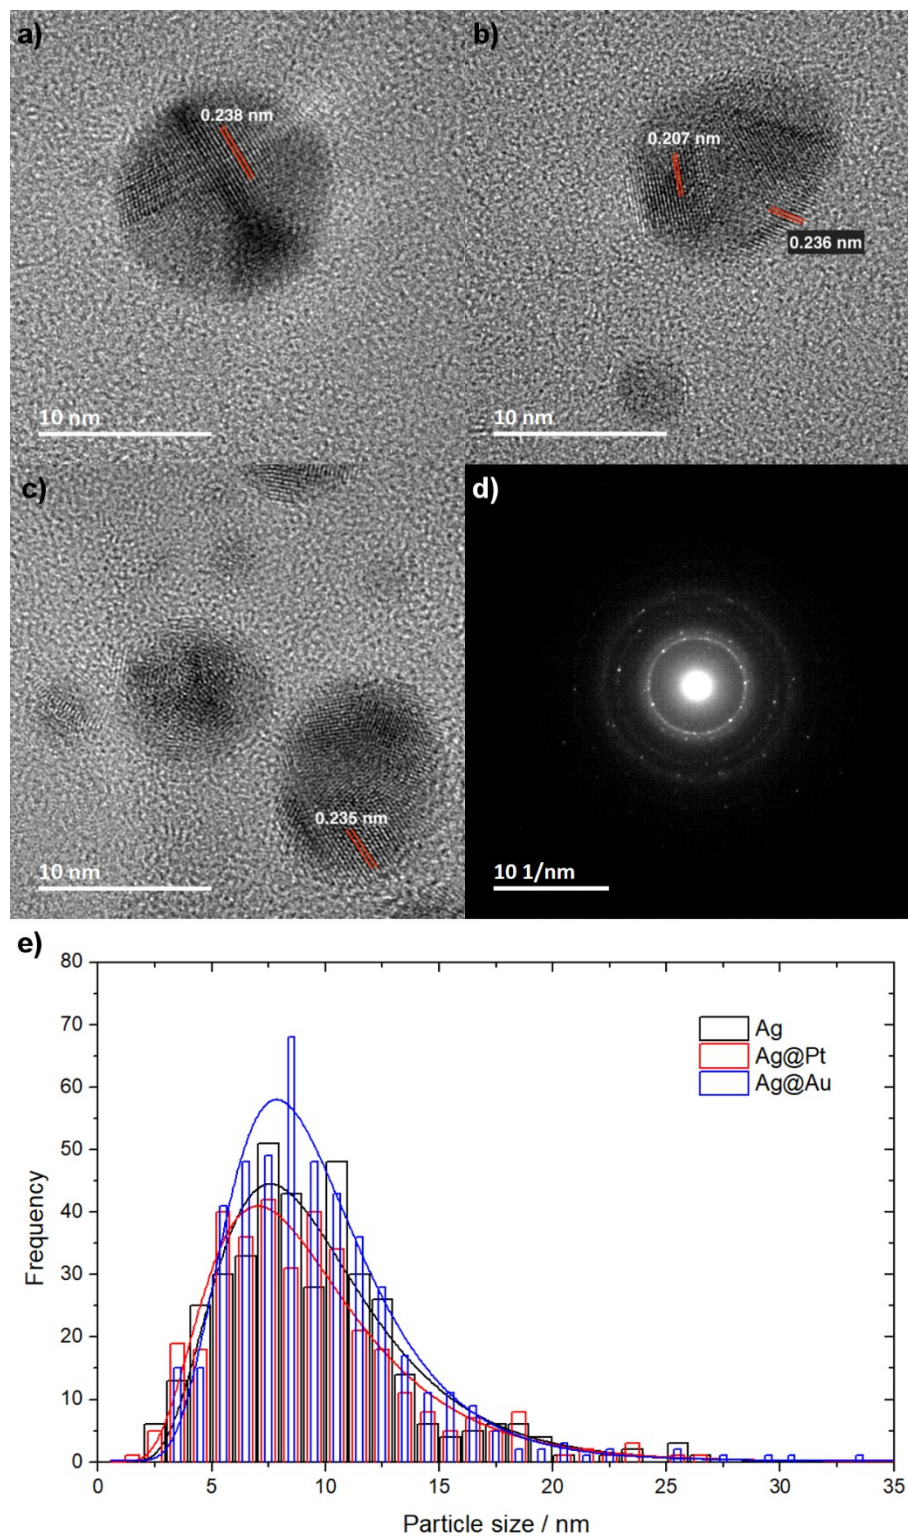

**Figure S4.** HRTEM images for (a) Ag NPs/CNFs, (b) Ag@Au NPs/CNF, and (c) Ag@Pt NPs/CNF, (d) electron diffraction pattern for Ag@Au NPs/CNF, and (e) size distribution of Ag, Ag@Au and Ag@Pt NPs/CNF measured by TEM.

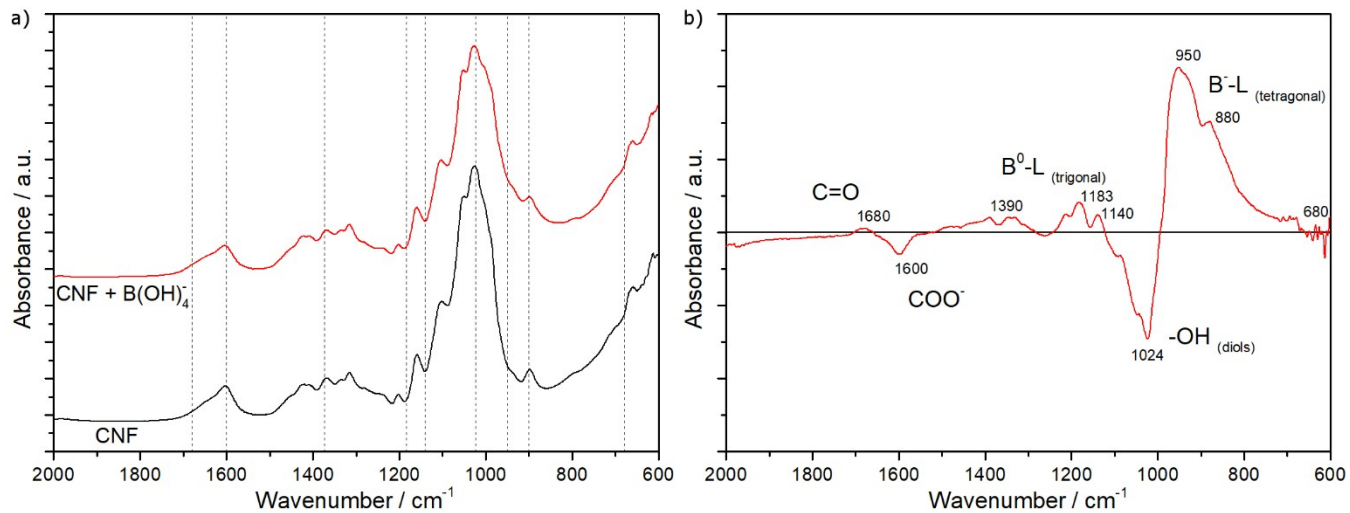

**Figure S5.** (a) FTIR spectra of CNF with and without borate ions as cross-linking agent and (b) differential FTIR spectrum of CNF with and without borate ions as cross-linking agent.
